# Supplementary material for: Bowl-shaped carbon skeletons under tensile stress: quantum mechanochemistry of corannulene
Source: Royal Society of Chemistry journal article supplement (doi:10.1039/d2nj05233d), 2023-01-01
Supplement: d2nj05233d1.pdf [file d2nj05233d1.pdf]

Electronic Supplementary Information (ESI) for  
**Bowl-Shaped Carbon Skeleton under Tensile Stress:  
Quantum Mechanochemistry of Corannulene**

*Zi-Yang Qiu,<sup>a</sup> Xiang Zhao,<sup>\*b</sup> and Jing-Shuang Dang<sup>\*a</sup>*

Table of Contents

|                                |         |
|--------------------------------|---------|
| 1. Figure S1 ~ Figure S5 ..... | P2 – P3 |
| 2. Table S1 ~ Table S10.....   | P3 – P6 |

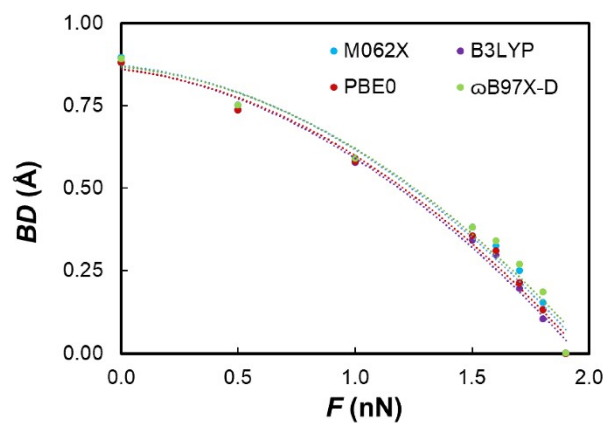

Fig. S1. Correlations and fitting curves (in dashed lines) between applied force ( $F$ ) and bowl-depth ( $BD$ ) of COR stretching using different density functionals.

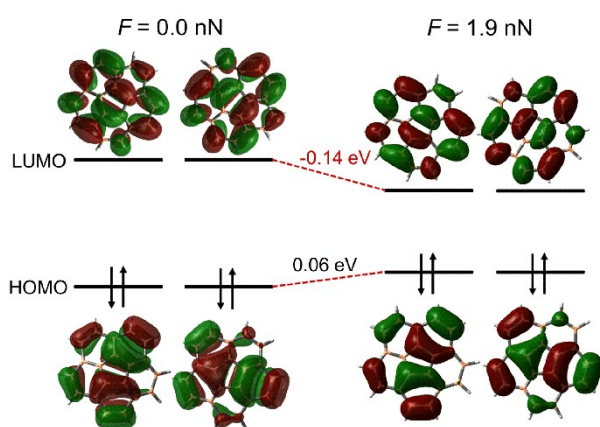

Fig. S2. Frontier orbital diagrams (isovalue = 0.02 au) and energy levels of COR at  $F = 0.0$  nN and  $F = 1.9$  nN.

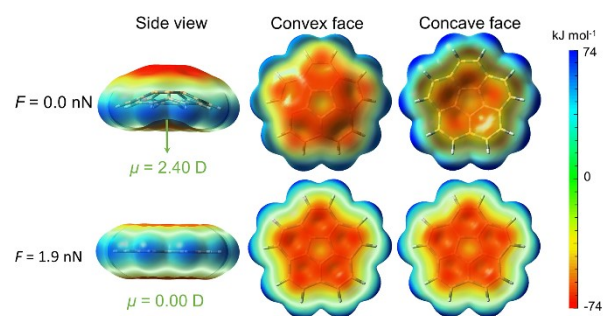

Fig. S3. Electrostatic potential maps of COR at  $F = 0.0$  and  $F = 1.9$  nN

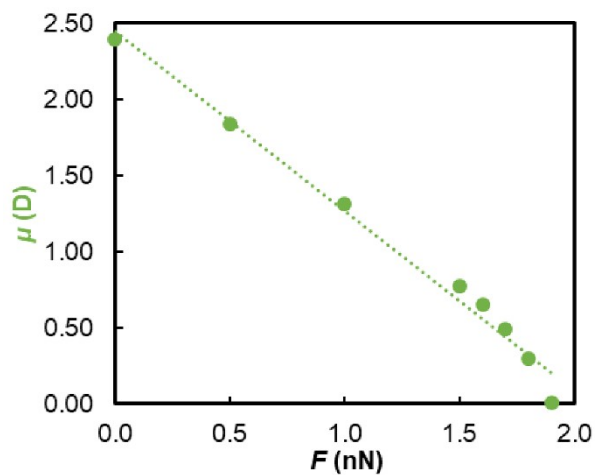

Fig. S4. Correlation and fitting curve (in dashed line) between applied force ( $F$ ) and dipole moment ( $\mu$ ) of COR.

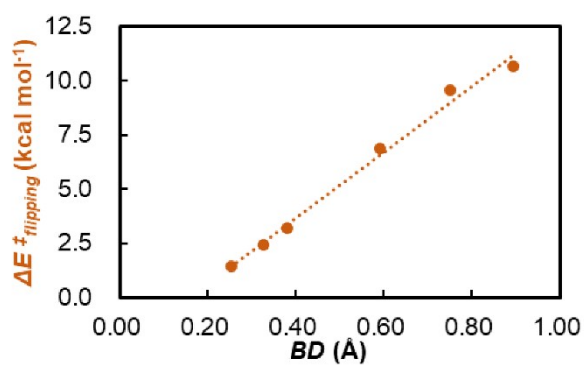

Fig. S5. Correlation and fitting curve (in dashed line) between bowl-depth ( $BD$ ) of COR and reaction barrier of corannulene flipping.

Table S1. Calculated bowl-depths ( $BD$ ) and electronic energies ( $E$ ) of COR under applied forces ( $F$ ).

| $F$ (nN) | $BD$ (Å) | $E$ (a.u.) |
|----------|----------|------------|
| 0.0      | 0.895    | -768.0093  |
| 0.5      | 0.751    | -768.0072  |
| 1.0      | 0.591    | -768.0018  |
| 1.5      | 0.381    | -767.9941  |
| 1.6      | 0.327    | -767.9923  |
| 1.7      | 0.252    | -767.9903  |
| 1.8      | 0.155    | -767.9884  |
| 1.9      | 0.000    | -767.9869  |

Table S2. Calculated bond lengths of COR under applied forces ( $F$ ).

| $F$ (nN) | bond length ( $\text{\AA}$ ) |       |       |       |       |
|----------|------------------------------|-------|-------|-------|-------|
|          | hub                          | spoke | flank | rim   | C-H   |
| 0.0      | 1.416                        | 1.376 | 1.445 | 1.379 | 1.085 |
| 0.5      | 1.413                        | 1.373 | 1.453 | 1.385 | 1.089 |
| 1.0      | 1.411                        | 1.371 | 1.462 | 1.391 | 1.093 |
| 1.5      | 1.409                        | 1.369 | 1.470 | 1.398 | 1.098 |
| 1.6      | 1.408                        | 1.368 | 1.472 | 1.399 | 1.099 |
| 1.7      | 1.408                        | 1.368 | 1.474 | 1.400 | 1.100 |
| 1.8      | 1.407                        | 1.368 | 1.476 | 1.401 | 1.101 |
| 1.9      | 1.407                        | 1.367 | 1.477 | 1.402 | 1.102 |

Table S3. Calculated bond lengths of the transition states of COR flipping under applied forces ( $F$ ).

| $F$ (nN) | bond length of TS ( $\text{\AA}$ ) |       |       |       |       |
|----------|------------------------------------|-------|-------|-------|-------|
|          | hub                                | spoke | flank | rim   | C-H   |
| 0.0      | 1.396                              | 1.359 | 1.461 | 1.394 | 1.085 |
| 0.5      | 1.399                              | 1.361 | 1.465 | 1.396 | 1.089 |
| 1.0      | 1.402                              | 1.363 | 1.469 | 1.398 | 1.093 |
| 1.5      | 1.405                              | 1.366 | 1.474 | 1.400 | 1.098 |
| 1.6      | 1.406                              | 1.366 | 1.475 | 1.400 | 1.099 |
| 1.7      | 1.406                              | 1.367 | 1.476 | 1.401 | 1.100 |
| 1.8      | 1.407                              | 1.367 | 1.476 | 1.401 | 1.101 |

Table S4. Calculated bowl-depths ( $BD$ ) of COR under applied forces ( $F$ ) using different density functionals.

| $F$ (nN) | $BD$ ( $\text{\AA}$ ) |       |       |                 |
|----------|-----------------------|-------|-------|-----------------|
|          | M062X                 | B3LYP | PBE0  | $\omega$ B97X-D |
| 0.0      | 0.895                 | 0.882 | 0.881 | 0.892           |
| 0.5      | 0.751                 | 0.736 | 0.737 | 0.752           |
| 1.0      | 0.591                 | 0.578 | 0.583 | 0.591           |
| 1.5      | 0.381                 | 0.344 | 0.356 | 0.382           |
| 1.6      | 0.327                 | 0.299 | 0.310 | 0.342           |
| 1.7      | 0.252                 | 0.197 | 0.214 | 0.271           |
| 1.8      | 0.155                 | 0.105 | 0.134 | 0.187           |
| 1.9      | 0.000                 | 0.003 | 0.000 | 0.001           |

Table S5. Calculated bowl-depths ( $BD$ ) of COR derivatives under applied forces ( $F$ ).

| $F$ (nN) | $BD$ (Å)       |                 |                |
|----------|----------------|-----------------|----------------|
|          | $C_{20}F_{10}$ | $C_{20}Cl_{10}$ | $C_{20}H_{10}$ |
| 0.0      | 0.870          | 0.553           | 0.895          |
| 0.5      | 0.711          | 0.394           | 0.751          |
| 1.0      | 0.538          | 0.000           | 0.591          |
| 1.5      | 0.316          | -               | 0.381          |
| 1.6      | 0.236          | -               | 0.327          |
| 1.7      | 0.087          | -               | 0.252          |
| 1.8      | 0.015          | -               | 0.155          |
| 1.9      | 0.007          | -               | 0.000          |

Table S6. Calculated frontier orbital energy levels of COR at  $F = 0.0$  and  $F = 1.9$  nN.

| $F$ (nN) | LUMO energy (eV) | HOMO energy (eV) |
|----------|------------------|------------------|
| 0.0      | -1.07            | -7.55            |
| 1.9      | -1.21            | -7.49            |

Table S7. Calculated NICS vales of the centers of hub pentagon ( $NICS_p$ ) and hexagon ( $NICS_h$ ) of COR under stress.

| $F$ (nN) | $NICS_p$ | $NICS_h$ |
|----------|----------|----------|
| 0.0      | 8.95     | -6.60    |
| 0.5      | 10.17    | -6.01    |
| 1.0      | 10.96    | -5.56    |
| 1.5      | 11.42    | -5.21    |
| 1.9      | 11.54    | -5.01    |

Table S8. Calculated dipole moments ( $\mu$ ) of COR under applied forces ( $F$ ).

| $F$ (nN) | $\mu$ (D) |
|----------|-----------|
| 0.0      | 2.395     |
| 0.5      | 1.835     |
| 1.0      | 1.314     |
| 1.5      | 0.772     |
| 1.6      | 0.650     |
| 1.7      | 0.490     |
| 1.8      | 0.298     |
| 1.9      | 0.003     |

Table S9. Calculated energies of reactant ( $E_{\text{COR}}$ ) and transition state ( $E_{\text{TS}}$ ) for COR flipping under applied forces ( $F$ ).

| $F$ (nN) | $E_{\text{COR}}$ (a.u.) | $E_{\text{TS}}$ (a.u.) |
|----------|-------------------------|------------------------|
| 0.0      | -768.0093               | -767.9923              |
| 0.5      | -768.0072               | -767.9919              |
| 1.0      | -768.0018               | -767.9908              |
| 1.5      | -767.9941               | -767.9890              |
| 1.6      | -767.9923               | -767.9885              |
| 1.7      | -767.9903               | -767.9880              |
| 1.8      | -767.9884               | -767.9883              |

Table S10. Calculated binding energy of  $\text{C}_{60}@\text{COR}$  ( $E_{\text{bind}}$ ) under applied forces ( $F$ ).

| $F$ (nN) | $E_{\text{bind}}$ (a.u.) |
|----------|--------------------------|
| 0.0      | -3053.9193               |
| 0.5      | -3053.9181               |
| 1.0      | -3053.9139               |
| 1.5      | -3053.9077               |
| 1.6      | -3053.9068               |
| 1.7      | -3053.9058               |
| 1.8      | -3053.9040               |
| 1.9      | -3053.9032               |
